# Supplementary material
Source: PubMed Central journal article supplement (PMC8761363)
Supplement: NIHMS1756275-supplement-1.pdf [file NIHMS1756275-supplement-1.pdf]

| Gestational age | T2-weighted imaging in coronal and sagittal planes                                            |  |                                                                                                  |  |
|-----------------|-----------------------------------------------------------------------------------------------|--|--------------------------------------------------------------------------------------------------|--|
| 24-27+6         | 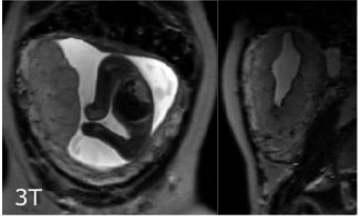 <p>3T</p>   |  |  <p>3T</p>     |  |
|                 |  <p>3T</p>   |  |  <p>1.5T</p>   |  |
| 28-31+6         |  <p>3T</p>  |  |  <p>3T</p>    |  |
|                 |  <p>3T</p> |  |  <p>1.5T</p> |  |

**Supplementary Figure S1: T2-weighted placental imaging in coronal and sagittal planes from low risk pregnancies with anterior placental location at 1.5T and 3T imaging. Note more marked lobulation at 3T**

| Gestational age | T2-weighted imaging in coronal and sagittal planes                                  |  |                                                                                      |  |
|-----------------|-------------------------------------------------------------------------------------|--|--------------------------------------------------------------------------------------|--|
| 32-35+6         | 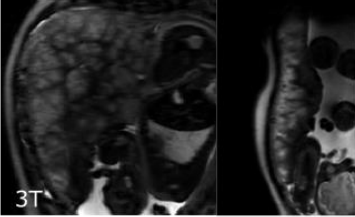   |  |    |  |
|                 |    |  |    |  |
| 36-39+6         |   |  |   |  |
|                 |  |  |  |  |

**Supplementary Figure S1 (cont): T2-weighted placental imaging in coronal and sagittal planes from low risk pregnancies with anterior placental location at 1.5T and 3T imaging.**

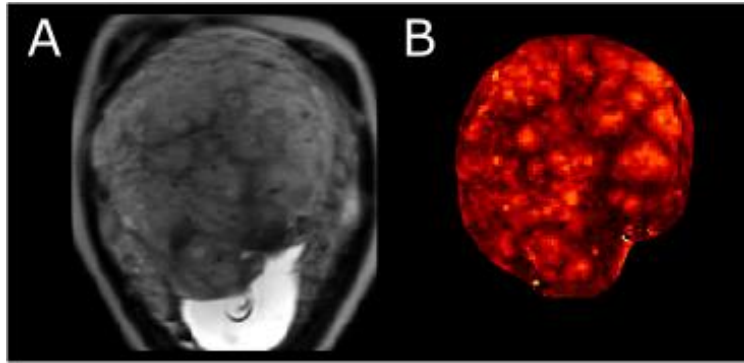

Supplementary Figure S2: (A) T2-weighted placental imaging with corresponding (B) T2\* map

| Gestational age | T2-weighted imaging in coronal and sagittal planes |  |          |  |
|-----------------|----------------------------------------------------|--|----------|--|
| 28-31+6         | <br>3T                                             |  | <br>3T   |  |
|                 | <br>3T                                             |  | <br>1.5T |  |
|                 | <br>3T                                             |  | <br>3T   |  |
|                 | <br>3T                                             |  | <br>1.5T |  |

Supplementary Figure S3: T2-weighted placental imaging in coronal and sagittal planes in

women with preeclampsia, from 28 to 34 weeks' gestation.

| Gestational age | T2-weighted imaging in coronal and sagittal planes                                 |
|-----------------|------------------------------------------------------------------------------------|
| 34-37           | 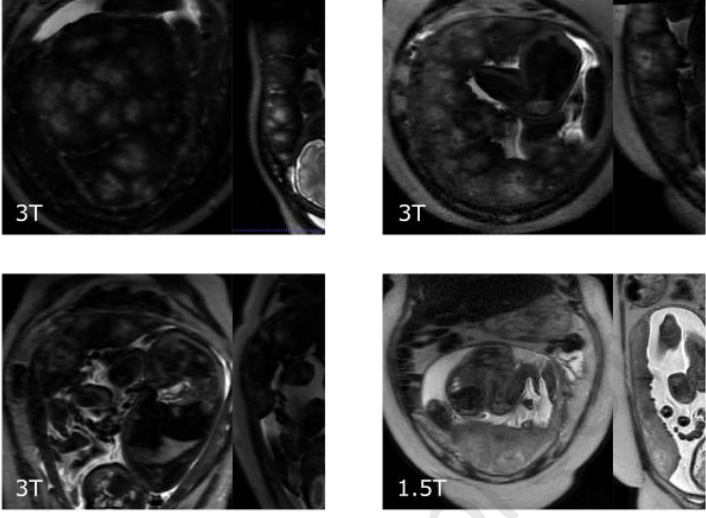 |

Supplementary Figure S4: T2-weighted placental imaging in coronal and sagittal planes in women with preeclampsia, from 34 to 37 weeks' gestation.

Journal Pre-proof

| Gestational age | T2-weighted imaging in coronal and sagittal planes                                  |  |                                                                                      |  |
|-----------------|-------------------------------------------------------------------------------------|--|--------------------------------------------------------------------------------------|--|
| 24-27+6         | 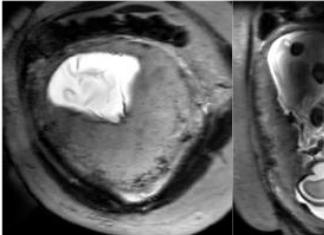   |  |    |  |
|                 |    |  |    |  |
| 28-31+6         |   |  |   |  |
|                 |  |  |  |  |

**Supplementary Figure S5: T2-weighted placental imaging in coronal and sagittal planes in women with chronic hypertension from 24 to 32 weeks' gestation.**

**Note the varied placental appearance with some showing an appropriate for gestation placenta and others a more mature appearance with increased lobulation, wider septa and more marked heterogeneity than expected for gestational age.**

| Gestational age | T2-weighted imaging in coronal and sagittal planes                                 |
|-----------------|------------------------------------------------------------------------------------|
| 32-35+6         | 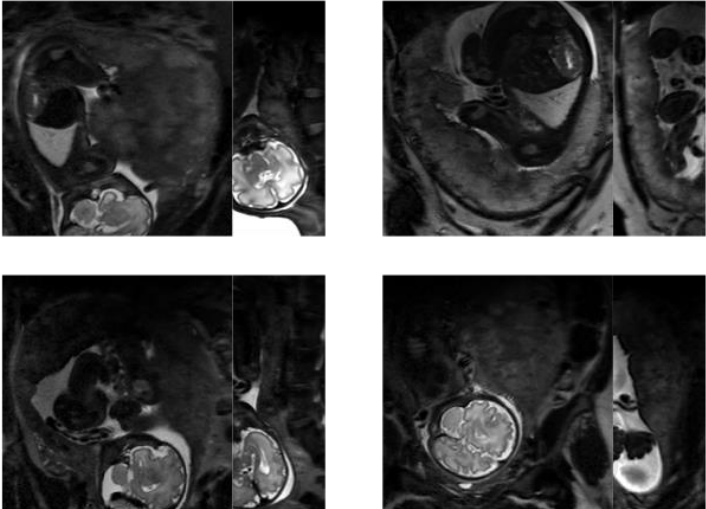 |
| 36-39+6         |  |

**Supplementary Figure S6: T2-weighted placental imaging in coronal and sagittal planes in women with chronic hypertension from 32-40 weeks' gestation.**

**Note the varied placental appearance with some showing an appropriate for gestation placenta and others a more advanced appearance with increased lobulation, wider septa and more marked heterogeneity than expected for gestational age.**
